# Supplementary material for: Addressing the Joint Impact of Temperature and pH on Vibrio harveyi Adaptation in the Time of Climate Change
Source: MDPI journal article supplement (doi:10.3390/microorganisms11041075), 2023-04-20
Supplement: s1 [file s1]

**A****Inoculation****Incubation at 20 °C, 25 °C or 30 °C****Overnight culture****Dilution  
1:40**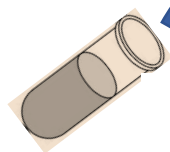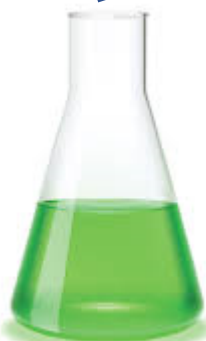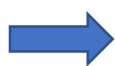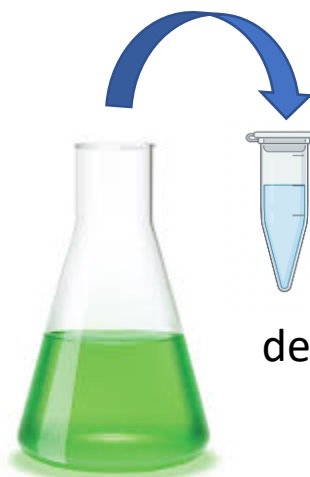Aliquotes for  
further analyses  
depicted in **B**, **C** and **D**ASW+ 0.1 M HEPES  
(pH 7.0, 7.5, 8.0, 8.3 or 8.5)**B**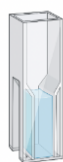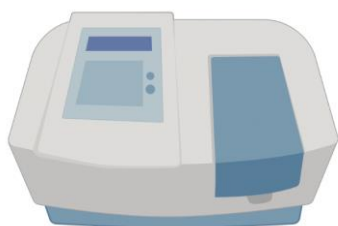Measurement of  
optical density (O.D.)  
at 600 nm**C**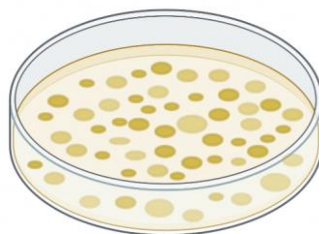Analysis of cell culturability  
on Marine agar at 26 °C for  
24 h**D**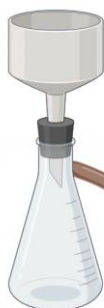Propidium iodide  
staining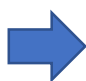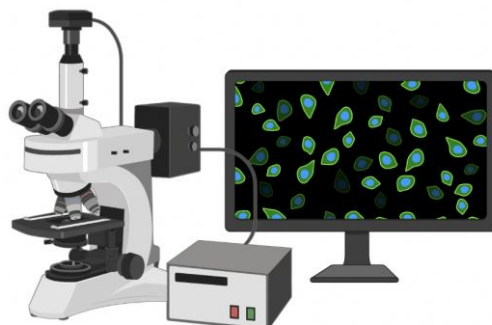

Total cell counting + cell size analysis

**Figure S1. Analysis of *V. harveyi* cells from survival assays**

**A**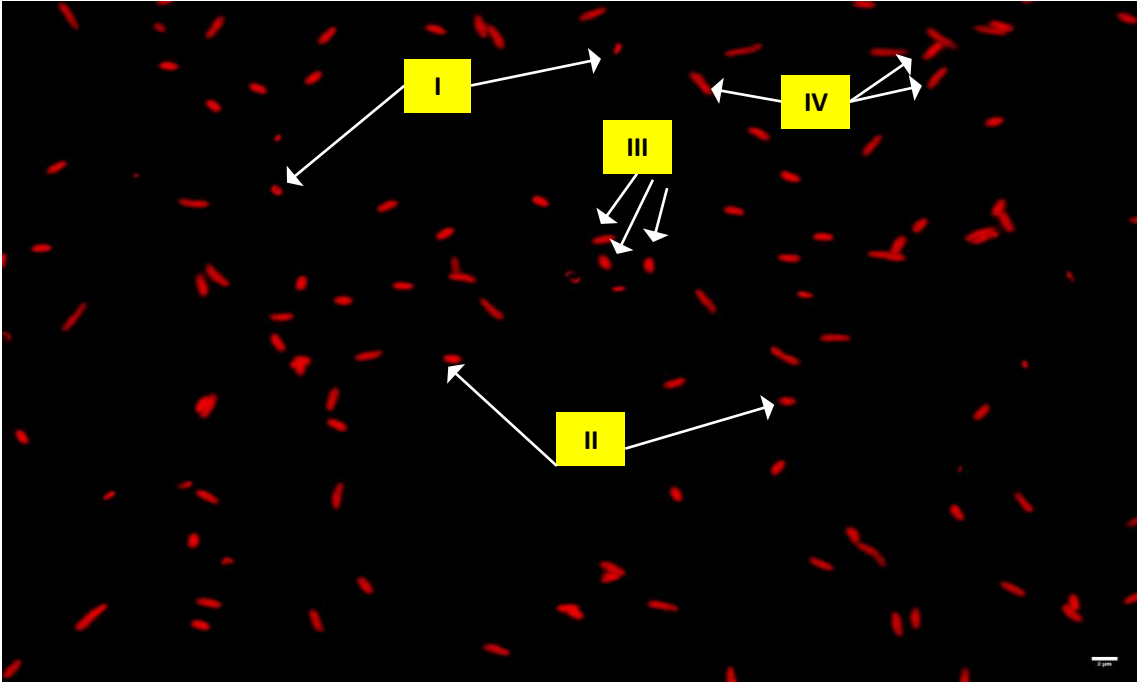**B**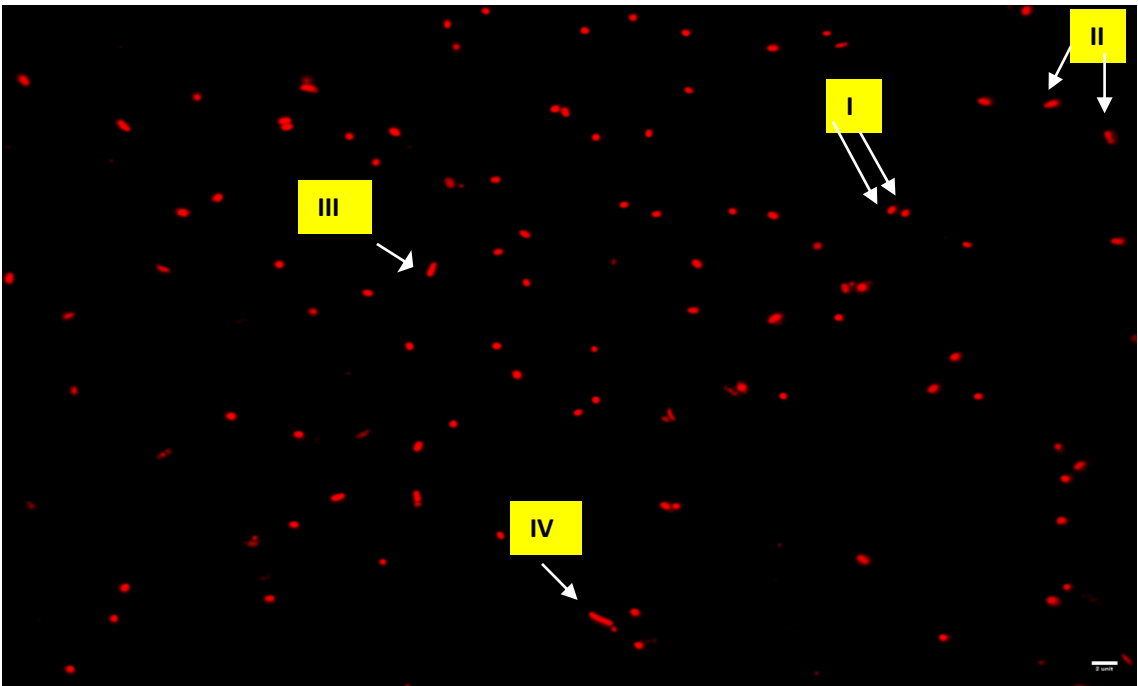

**Figure S2. Examples of *V. harveyi* cells that possess different morphology at pH 8.5 and 30 °C. The images correspond to the cells present in the control sample (panel A) and population obtained after incubation for 21 day (panel B). Several cells of different sizes indicated by arrows:  $\leq 0.95$  (I);  $> 0.95 - \leq 1.3$  (II);  $> 1.3 - 1.6 \leq$  (III);  $> 1.6$  (IV).**
